# Supplementary material
Source: publisher figshare collection journal article supplement (https://rs.figshare.com/ndownloader/files/14737955)
Supplement: Supplementary file 1 [file 14737955]

**Supporting information for:**

**Lévy walk process in self-organization of pedestrian crowds**

Hisashi Murakami1, Claudio Feliciani1, Katsuhiro Nishinari1,2

1Research Center for Advanced Science and Technology, The University of Tokyo, Meguro-ku, 153-8904 Tokyo, Japan

2Department of Aeronautics and Astronautics, Graduate School of Engineering, The University of Tokyo, Bunkyo-ku, 153-0041 Tokyo, Japan

**This SI contains text S1–S3, figures S1–S7, tables S1–S9, and references for SI.**

**Text S1. Threshold value of order parameter for dividing pedestrian behaviour into before and after lane formation**

In previous studies, lane formation was detected using various timing methods [1, 2]. For example, lane formation was considered to start when the leading pedestrians of oppositely moving flows encountered each other around the center line [1] (we refer to this timing as *Tcl*). However, traffic organization would continue after *Tcl*. Then, immediately after *Tcl*, we need to detect the division of the pedestrian behaviour before and after lane formation as long as the data before the lane-formation do not contain much of those of after lane formation. Moreover, we need to account for the difference between the division times of the conditions and trials. Hence, to determine the time of unidirectional lane formation, we defined a threshold value *Op* of the order parameter *Φ*. We considered that lane formation starts at some time *Tlf*, when *Φ* first exceeds *Op*. In the present study, lane formation was consistent with visual inspection at *Op* = 0.8. However, to further consider the integrity of this value, we investigated the time development of the order parameter and its relations to *Tlf* and *Tcl*. Figure S1 plots the order parameters as functions of time under each flow ratio condition (3/3, 4/2, 5/1, and 6/0). All of the plotted lines are roughly trapezoidal, showing a steady increase in order parameter, saturation around *Op* = 0.8, and then a gradual decrease. The approximate time at which *Φ* reaches the first (left) corner of the trapezoid appropriately indicates when the pedestrian behaviour divides, provided that the data before and after lane formation are reasonably separated. When *Op* = 0.8 in the present data, *Tlf* is typically larger than *Tcl* and meets the above criterion (figure S1). We then checked the *Tlf* with two order parameters flanking *Op* = 0.8 (namely, 0.75 and 0.85). Setting *Op* = 0.75 did not alter the *Tlf* from that of 0.8, because the order parameter of our data discretely changes and takes the value of 0.8 after 0.733 with no intermediate value. Therefore, the times at which the order parameter first exceeds 0.75 and 0.8 were equal. Setting *Op* = 0.7 resulted in a much shorter *Tlf* than *Tcl* and excessively reduced the sample size in some trials; therefore, this case was considered as infeasible and was dismissed. When *Op* = 0.85, *Tlf* also occurred around the first corner (figure S1). Indeed, when we checked the step-length distributions, the distributions behaved similarly for *Op* = 0.85 and *Op* = 0.8, and the supported models of both order parameters were identical before and after the lane formation under all conditions (tables S1 and S2).

**Text S2. Analysis of the step lengths of individual pedestrians.**

In the analysis that has been presented in the main text, we have investigated the rank distributions of the step lengths under different conditions at the group level.

However, it is known that if there is a variation between individuals, they may collectively appear to Lévy walk, even when individuals move in a predominantly Brownian manner at their own scale [3]. Our data seem to show different lateral deviations among individuals (figure 2b1; see also figure S5 where we calculated mean absolute value of *y*-component of velocity for data of ten individuals in figure 2b1 that first enters the measurement area.). Nevertheless, this does not immediately mean the absence of Lévy walk at an individual level. As first proposed by de Jager et al. [4] and later theoretically justified by Reynolds [5], a Lévy walk can be approximated by adopting an intrinsic composite movement strategy with different modes. In other words, there is a possibility that individuals change their movement strategy depending on the environmental context, resulting in a Lévy walk pattern even at the individual level (conversely, it has been reported that individual mussels show intrinsic Lévy walks even without others and their strategy gradually changes via interactions with others [6]). Hence, we herein separately investigate the individual data to check whether a Lévy walk still exists at the individual level, or it appears only at the collective level due to the individual variation (showing a Brownian walk at the individual level).

Note that, however, such individual data could not be used under all conditions because the sample sizes of the majority of the individual distributions are observed to be smaller than the effective sample size (i.e., the number of step lengths between *lmin* and *lmax*) of greater than or equal to 50 as recommended in [7]. Further, the pedestrians in the minor group under the 5/1 condition only exhibited a Lévy walk pattern over the entire time interval (i.e., both before and after lane formation). These entire time interval data (which are still individual data) exhibit effective sample size; therefore, we have performed an additional analysis on such data. Furthermore, we observed that all the individual data supported the truncated power-law model (Table S8). Figure S6 denotes the step-length distributions of each individual along with the best-fitting truncated power-law and exponential. This result implies that the movement is a Lévy walk, even at the individual level**.**

**Text S3. Additional analysis to seek the model fit of the rank distribution of step lengths after lane formation.**

In the analysis that has been presented in the main text, the rank distribution of step lengths before lane formation supported either the truncated power-law (Lévy walk) or exponential (Brownian walk) models; however, the step length distribution after lane formation seems to follow neither of the aforementioned models, except for the minor group under the 5/1 condition. Further, to explore other fitting models, we present a bi-exponential model (composite Brownian walk; this is also considered through a mixture of three or four exponentials) [5]. The probability density function of the bi-exponential model is given as *f*(*l*) = *pλ*1exp(−*λ*1 (*l* − *lmin*)) + (1 − *p*) *λ*2exp(−*λ*2(*l* − *lmin*)), where *λ*1 and *λ*2 denote the exponents for the model and *p* determines the frequency of each model; hence, we can conclude that there are three parameters in the model. To find the best-fit parameters, we numerically maximize the log-likelihood function. After evaluating the best-fit model for the data after lane formation (except for the 5/1 condition), the goodness-of-fit was calculated using the KS test. We further considered the bi-exponential model to be plausible for the data if the resulting *P* value was greater than 0.05. Therefore, we discovered that majority of the data after lane formation (i.e., the major and minor groups under 4/2 condition and the major group under both 5/1and 6/0 conditions) fitted with the bi-exponential model (Table S9). Figure S8 denotes the step-length distributions along with the best-fitting truncated power-law, exponential, and bi-exponential models. Previous studies indicate that the composite Brownian walks could be an alternative to Lévy walks and that they share several similarities with Lévy walks because of their multi-scale movement patterns [5]. Therefore, this additional result indicates that the step-length distribution after lane formation includes more long steps than those included in the simple exponential model, implying that the pedestrian motions after lane formation tend to be more exploratory than those in Brownian walk.

**Figure S1**

**Figure S1. Time development of order parameter under each condition**: (*a*) 3/3, (*b*) 4/2, (*c*) 5/1, and (*d*) 6/0. The blue lines show the mean ± standard deviations of the order parameter (dotted lines). The red lines indicate the mean encounter time of pedestrians in opposite groups (*Tcl*) and the mean time at which the order parameter first exceeds threshold values of 0.8 and 0.85 (*Tlf*).

**Figure S2**

**Figure S2. Mean-square displacement along the y-axis under the 4/2 and 5/1 conditions**: before lane formation under the 4/2 major (*a*1) and minor (*a*2), and 5/1 major (*b*1) and minor (*b*2) conditions, and after lane formation under the 4/2 major (*c*1) and minor (*c*2), and 5/1 major (*d*1) and minor (*d*2) conditions. Inserts show the data over the entire time interval.

**Figure S3**

**Figure S3. Rank distributions of step length along the y-axis under the 4/2 and 5/1 conditions**: before lane formation under the 4/2 major (*a*1) and minor (*a*2), and 5/1 major (*b*1) and minor (*b*2) conditions, and after lane formation under the 4/2 major (*c*1) and minor (*c*2), and 5/1 major (*d*1) and minor (*d*2) conditions. The green and blue lines are the model fits to the truncated power law and exponential distributions, respectively.

**Figure S4**

**Figure S4. Time dependence of step lengths before lane formation.** The behaviour before lane formation in the 3/3 condition was divided into four sub-intervals. The upper figures show the rank distributions of each sub-interval. The green and blue lines are the model fits to the truncated power law and exponential distributions, respectively. In the bottom figure, the distributions of each sub-interval are superimposed, showing their gradual change.

**Figure S5**

**Figure S5. Mean absolute value of y-component of velocity for data of ten individuals in figure 2b1 that first enters the measurement area.**

**Figure S6**

**Figure S6. Rank distributions of step length along the y-axis during the entire time interval displayed by each individual pedestrian belonging to the minor group in the 5/1 condition**. The number *i* in each plot indicates the individual number of the minor group that corresponds to that in table S8. The green and blue lines indicate the model fits to the truncated power-law and exponential distributions, respectively.

**Figure S7**

**Figure S7. Additional model fitting of the step length rank distributions after lane formation with bi-exponential models.** The green, blue and purple lines denote the model fits to the truncated power-law, exponential and bi-exponential distributions, respectively.

**Table S1. Data of step-length distributions before lane formation (*Op* = 0.85).**

|  | | **3/3** | **4/2 major** | **4/2 minor** | **5/1 major** | **5/1 minor** | **6/0** |
| --- | --- | --- | --- | --- | --- | --- | --- |
| ***N*1** | | 950 | 322 | 274 | 488 | 170 | 797 |
| ***lmax*** | | 99.9 | 47.1 | 47.3 | 45.8 | 20.5 | 46.7 |
| **Exponent** | ***μ*** | 2.28 | 2.09 | 2.45 | 2.06 | 2.03 | 2.09 |
| ***λ*** | 0.265 | 0.246 | 0.326 | 0.256 | 0.311 | 0.285 |
| ***wAIC*** | ***w*(*tp*)2** | 1.00 | 1.00 | 1.00 | 1.00 | 1.00 | 0.00 |
| ***w*(*e*)3** | 0.00 | 0.00 | 0.00 | 0.00 | 0.00 | 1.00 |
| ***GOF*** | ***P* value** | 0.400 | 0.286 | 0.993 | 0.278 | 0.930 | 0.0672 |
| ***D* statistic** | 0.0411 | 0.0776 | 0.0365 | 0.0635 | 0.0588 | 0.0657 |
| **Best fit model** | | Truncated power-law | Truncated power-law | Truncated power-law | Truncated power-law | Truncated power-law | Exponential |

1Total number of step-lengths

2AIC weight of truncated power-law model

3AIC weight of exponential model

**Table S2. Data of step-length distributions after lane formation (*Op* = 0.85).**

|  | | **3/3** | **4/2 major** | **4/2 minor** | **5/1 major** | **5/1 minor** | **6/0** |
| --- | --- | --- | --- | --- | --- | --- | --- |
| ***N*** | | 3263 | 1893 | 1133 | 2353 | 516 | 2464 |
| ***lmax*** | | 80.2 | 69.5 | 50.6 | 65.8 | 38.1 | 48.3 |
| **Exponent** | ***μ*** | 2.29 | 2.03 | 2.20 | 2.02 | 2.15 | 2.22 |
| ***λ*** | 0.229 | 0.219 | 0.298 | 0.215 | 0.281 | 0.314 |
| ***wAIC*** | ***w*(*tp*)** | 1.00 | 1.00 | 1.00 | 1.00 | 1.00 | 1.00 |
| ***w*(*e*)** | 0.00 | 0.00 | 0.00 | 0.00 | 0.00 | 0.00 |
| ***GOF*** | ***P* value** | 1.73E−05 | 0.00913 | 0.0265 | 0.0154 | 0.58 | 3.18E−05 |
| ***D* statistic** | 0.0598 | 0.0534 | 0.0618 | 0.0455 | 0.0484 | 0.067 |
| **Best fit model** | | Neither | Neither | Neither | Neither | Truncated power-law | Neither |

**Table S3. Data of mean-square displacements before the lane-formation (estimated values ± standard errors, and statistical results).**

|  | **3/3** | **4/2 major** | **4/2 minor** | **5/1 major** | **5/1 minor** | **6/0** |
| --- | --- | --- | --- | --- | --- | --- |
| ***α*** | 1.65±0.01 | 1.43±0.01 | 1.57±0.01 | 1.30±0.02 | 1.32±0.02 | 0.895±0.06 |
| ***D*** | 198.0±1.00 | 76.3±1.01 | 172.2±1.01 | 57.5±1.02 | 88.6±1.02 | 22.8±1.06 |
| ***R*2** | 0.99 | 0.99 | 0.99 | 0.98 | 0.98 | 0.84 |
| ***F* statistic1** | 5.86E4 | 7608 | 2.29E4 | 3327 | 2175 | 222.1 |
| ***P* value1** | <2.2E−16 | <2.2E−16 | <2.2E−16 | <2.2E−16 | <2.2E−16 | <2.2E−16 |

1calculated for 42 degrees of freedom

**Table S4. Data of mean-square displacements after lane formation (estimated values ± standard errors, and statistical results).**

|  | **3/3** | **4/2 major** | **4/2 minor** | **5/1 major** | **5/1 minor** | **6/0** |
| --- | --- | --- | --- | --- | --- | --- |
| ***α*** | 1.44±0.01 | 1.47±0.01 | 1.44±0.01 | 1.48±0.01 | 1.40±0.01 | 0.791±0.06 |
| ***D*** | 102.1±1.01 | 105.5±1.01 | 111.3±1.01 | 121.1±1.01 | 111.2±1.01 | 17.9±1.07 |
| ***R*2** | 0.99 | 0.99 | 0.99 | 0.99 | 0.99 | 0.85 |
| ***F* statistic1** | 1.19E4 | 1.12E4 | 8713 | 9899 | 7243 | 161.4 |
| ***P* value1** | <2.2E−16 | <2.2E−16 | <2.2E−16 | <2.2E−16 | <2.2E−16 | 6.64E−13 |

1Calculated for 42 degrees of freedom

**Table S5. Data of step-length distributions before lane formation.**

|  | | **3/3** | **4/2 major** | **4/2 minor** | **5/1 major** | **5/1 minor** | **6/0** |
| --- | --- | --- | --- | --- | --- | --- | --- |
| ***N*1** | | 541 | 193 | 180 | 247 | 93 | 143 |
| ***lmax*** | | 84.8 | 26.9 | 47.3 | 32.4 | 20.5 | 28.6 |
| **Exponent** | ***μ*** | 2.34 | 2.02 | 2.51 | 2.13 | 2.07 | 1.90 |
| ***λ*** | 0.297 | 0.280 | 0.353 | 0.304 | 0.320 | 0.274 |
| ***wAIC*** | ***w*(*tp*)2** | 1.00 | 0.99 | 1.00 | 0.99 | 0.99 | 0.08 |
| ***w*(*e*)3** | 0.00 | 0.01 | 0.00 | 0.01 | 0.01 | 0.92 |
| ***GOF*** | ***P* value** | 0.712 | 0.520 | 0.978 | 0.677 | 0.954 | 0.939 |
| ***D* statistic** | 0.0425 | 0.0829 | 0.05 | 0.0648 | 0.0753 | 0.0629 |
| **Best fit model** | | Truncated power-law | Truncated power-law | Truncated power-law | Truncated power-law | Truncated power-law | Exponential |

1Total number of step lengths

2AIC weight of truncated power law

3AIC weight of exponential law

**Table S6. Data of step-length distributions after lane formation.**

|  | | **3/3** | **4/2 major** | **4/2 minor** | **5/1 major** | **5/1 minor** | **6/0** |
| --- | --- | --- | --- | --- | --- | --- | --- |
| ***N*** | | 3673 | 2026 | 1228 | 2596 | 595 | 3120 |
| ***lmax*** | | 99.9 | 69.5 | 50.6 | 65.8 | 38.1 | 48.3 |
| **Exponent** | ***μ*** | 2.29 | 2.03 | 2.20 | 2.01 | 2.14 | 2.20 |
| ***λ*** | 0.296 | 0.219 | 0.297 | 0.216 | 0.284 | 0.308 |
| ***wAIC*** | ***w*(*tp*)** | 1.00 | 1.00 | 1.00 | 1.00 | 1.00 | 1.00 |
| ***w*(*e*)** | 0.00 | 0.00 | 0.00 | 0.00 | 0.00 | 0.00 |
| ***GOF*** | ***P* value** | 1.368E−5 | 0.0106 | 0.0369 | 0.00535 | 0.436 | 1.161E−7 |
| ***D* statistic** | 0.0569 | 0.0508 | 0.0570 | 0.0478 | 0.0504 | 0.0731 |
| **Best fit model** | | Neither | Neither | Neither | Neither | Truncated power-law | Neither |

**Table S7. Data of step-length distributions of the behaviour before lane formation in the 3/3 condition which was divided into four sub-intervals that corresponds to figure S4.**

|  | | **Sub-interval 1** | **Sub-interval 2** | **Sub-interval 3** | **Sub-interval 4** |
| --- | --- | --- | --- | --- | --- |
| ***N*** | | 50 | 111 | 169 | 211 |
| ***lmax*** | | 11.9 | 15.7 | 29.0 | 84.8 |
| **Exponent** | ***μ*** | 2.47 | 2.47 | 2.32 | 2.08 |
| ***λ*** | 0.521 | 0.488 | 0.360 | 0.207 |
| ***wAIC*** | ***w*(*tp*)** | 0.97 | 0.88 | 0.99 | 1.00 |
| ***w*(*e*)** | 0.03 | 0.12 | 0.01 | 0.00 |
| ***GOF*** | ***P* value** | 0.544 | 0.758 | 0.928 | 0.990 |
| ***D* statistic** | 0.16 | 0.0901 | 0.0592 | 0.0427 |
| **Best fit model** | | Truncated power-law | Truncated power-law | Truncated power-law | Truncated power-law |

**Table S8. Data of step-length distributions during the entire time interval displayed by each individual pedestrian belonging to the minor group in the 5/1 condition, where *i* indicates the individual number that corresponds to that in figure S7.**

|  | | ***i* = 1** | ***i* = 2** | ***i* = 3** | ***i* = 4** | ***i* = 5** |
| --- | --- | --- | --- | --- | --- | --- |
| ***N*** | | 72 | 79 | 58 | 73 | 83 |
| ***lmax*** | | 21.5 | 27.1 | 21.8 | 38.1 | 35.0 |
| **Exponent** | ***μ*** | 2.43 | 1.94 | 1.62 | 2.19 | 2.00 |
| ***λ*** | 0.400 | 0.235 | 0.233 | 0.296 | 0.250 |
| ***wAIC*** | ***w*(*tp*)** | 0.99 | 1.00 | 0.97 | 0.99 | 0.99 |
| ***w*(*e*)** | 0.01 | 0.00 | 0.03 | 0.01 | 0.01 |
| ***GOF*** | ***P* value** | 0.885 | 0.812 | 0.982 | 0.966 | 0.929 |
| ***D* statistic** | 0.0972 | 0.101 | 0.0862 | 0.0822 | 0.0843 |
| **Best fit model** | | Truncated power-law | Truncated power-law | Truncated power-law | Truncated power-law | Truncated power-law |

|  | | ***i* = 6** | ***i* = 7** | ***i* = 8** | ***i* = 9** |
| --- | --- | --- | --- | --- | --- |
| ***N*** | | 98 | 73 | 70 | 82 |
| ***lmax*** | | 27.3 | 36.2 | 25.5 | 15.5 |
| **Exponent** | ***μ*** | 2.41 | 2.40 | 1.57 | 2.33 |
| ***λ*** | 0.366 | 0.310 | 0.207 | 0.455 |
| ***wAIC*** | ***w*(*tp*)** | 0.99 | 0.99 | 0.96 | 0.89 |
| ***w*(*e*)** | 0.01 | 0.01 | 0.04 | 0.11 |
| ***GOF*** | ***P* value** | 0.999 | 0.999 | 0.994 | 0.980 |
| ***D* statistic** | 0.051 | 0.0548 | 0.0714 | 0.0732 |
| **Best fit model** | | Truncated power-law | Truncated power-law | Truncated power-law | Truncated power-law |

**Table S9. Data of additional model fitting of the step length rank distributions after lane formation with bi-exponential models.**

|  | | **3/3** | **4/2 major** | **4/2 minor** | **5/1 major** | **6/0** |
| --- | --- | --- | --- | --- | --- | --- |
| **Exponent** | ***p*** | 0.32 | 0.45 | 0.48 | 0.40 | 0.35 |
| ***λ*1** | 0.14 | 0.12 | 0.18 | 0.11 | 0.17 |
| ***λ*2** | 0.62 | 0.66 | 0.75 | 0.59 | 0.55 |
| ***GOF*** | ***P* value** | 0.00474 | 0.336 | 0.438 | 0.0767 | 0.0583 |
| ***D* statistic** | 0.0406 | 0.0296 | 0.035 | 0.0354 | 0.0337 |

**References for SI**

1. Feliciani C, Nishinari K. 2016 Empirical analysis of the lane formation process in bidirectional pedestrian flow. *Phys. Rev. E* **94(3)**, 032304. (doi: 10.1103/PhysRevE.94.032304)
2. Zhang J, Wang Q, Hu Y, Gao S, Xia L, Song W. 2018 The effect of a directional split flow ratio on bidirectional pedestrian streams at signalized crosswalks. *J. Stat. Mech.* **2018(7)**, 073408. (doi: 10.1088/1742-5468/aacez1e)
3. Petrovskii S, Mashanova A, Jansen VAA. 2011 Variation in individual walking behavior creates the impression of a Lévy flight. *Proc. Natl. Acad. Sci, USA* **108 (21)**, 8704-8707 (doi: 10.1073/pnas.1015208108)
4. de Jager M, Weissing FJ, Herman PMJ, Nolet BA, van de Koppel J. 2012 Response to Comment on "Lévy Walks Evolve Through Interaction Between Movement and Environmental Complexity". *Science* **335**, 918. (doi: 10.1126/science.1215903)
5. Reynolds AM. 2013 Selection pressures give composite correlated random walks Lévy walk characteristics. *J. Theor. Biol.* **332**, 117–122. (doi: 10.1016/j.jtbi.2013.04.035)
6. de Jager M, Bartumeus F, Kölzsch A, Weissing FJ, Hengeveld GM, Nolet BA, Herman PMJ, van de Koppel J. 2014 How superdiffusion gets arrested: ecological encounters explain shift from Lévy to Brownian movement. *Proc. R. Soc. B.* **281(1774)**, 20132605. (doi:10.1098/rspb.2013.2605)
7. Clauset A, Shalizi CR, Newman MEJ. 2009 Power-law distributions in empirical data. *SIAM Rev.* **51**, 661–703. (doi: 10.1137/070710111)
